# Supplementary material for: Tungsten–niobium oxide bronzes: a bulk and surface structural study
Source: Royal Society of Chemistry journal article supplement (doi:10.1039/d0dt02058c), 2020-01-01
Supplement: d0dt02058c1.pdf [file d0dt02058c1.pdf]

## Supporting Information for

### Tungsten-Niobium Oxide Bronzes: A Bulk and Surface

### Structural Study

by

Daniel Delgado <sup>a,b,\*</sup>, Patricia Concepción <sup>a</sup>, Annette Trunschke <sup>b</sup>, Jose M. López

Nieto <sup>a,\*</sup>

<sup>a)</sup> Instituto de Tecnología Química, Universitat Politècnica de València-Consejo Superior de Investigaciones Científicas, Avenida de los Naranjos s/n, 46022 Valencia, Spain. E-mail: [jmlopez@itq.upv.es](mailto:jmlopez@itq.upv.es) ; [dadelmuo@gmail.com](mailto:dadelmuo@gmail.com)

<sup>b)</sup> Department of Inorganic Chemistry, Fritz-Haber-Institute der Max-Planck-Gesellschaft e.V., Faradayweg 4-6, 14195 Berlin, Germany.

#### Contents:

- Fig. S1 XRD patterns of W-Nb-O oxides
- Fig. S2 Scanning Electron Microscopy images of W-Nb-O oxides
- Fig. S3 N<sub>2</sub>-adsorption-desorption isotherms of WNbO oxide bronzes
- Fig. S4 Temperature-programmed oxidation (TPO) profiles of selected as-prepared W-Nb-O samples
- Fig. S5 Nb 3d core-level XPS spectra of W-Nb-O oxides
- Fig. S6 Schemes of the formation of the so-called Magneli phases (A) and tetragonal tungsten bronze (TTB) (B)
- Fig. S7 Variation of CO-coverage as a function of equilibrium pressure for selected W-Nb-O oxides
- Fig. S8 CO adsorption on Nb<sub>2</sub>O<sub>5</sub>
- Table S1 Textural properties of W-Nb-O oxides
- Table S2 Binding energies for the main surface species in W-Nb-O oxides
- References

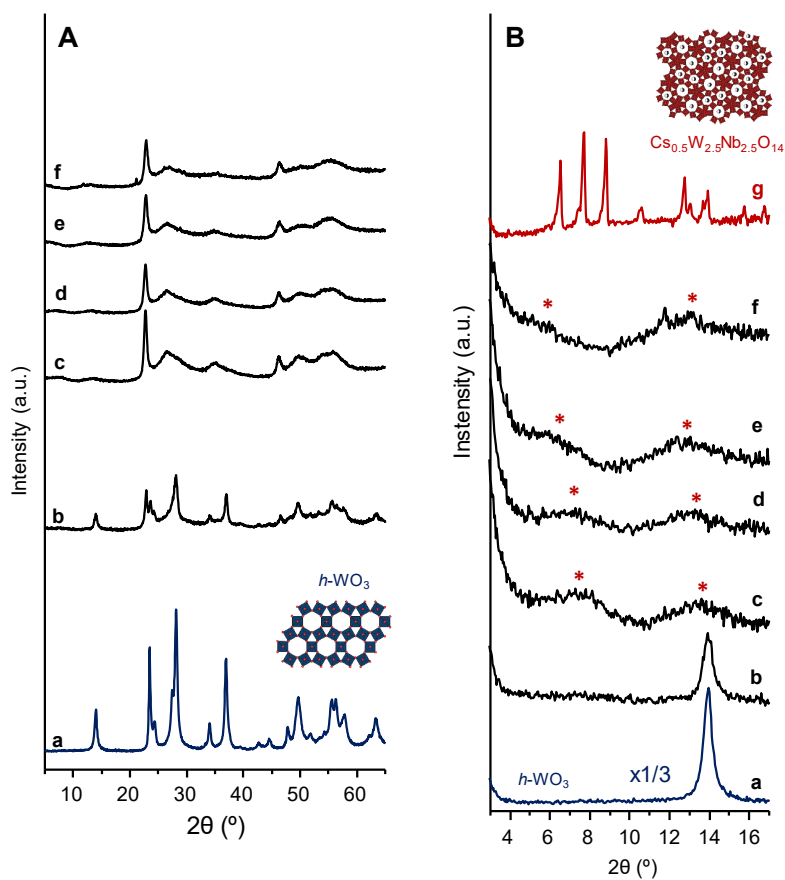

**Figure S1.** A) XRD patterns in the  $2\theta$  region 5-65° of as-prepared W-Nb-O oxides. a)  $\text{WO}_x$ ; b)  $\text{WNb}_{29}$ ; c)  $\text{WNb}_{62}$ ; d)  $\text{WNb}_{80}$ ; e)  $\text{WNb}_{95}$ ; f)  $\text{Nb}_{100}$ . B) XRD patterns in the  $2\theta$  region 3-17° W-Nb-O oxides. For comparison, the pattern of a  $\text{Cs}_{0.5}\text{W}_{2.5}\text{Nb}_{2.5}\text{O}_{14}$ -type phase is included (g).

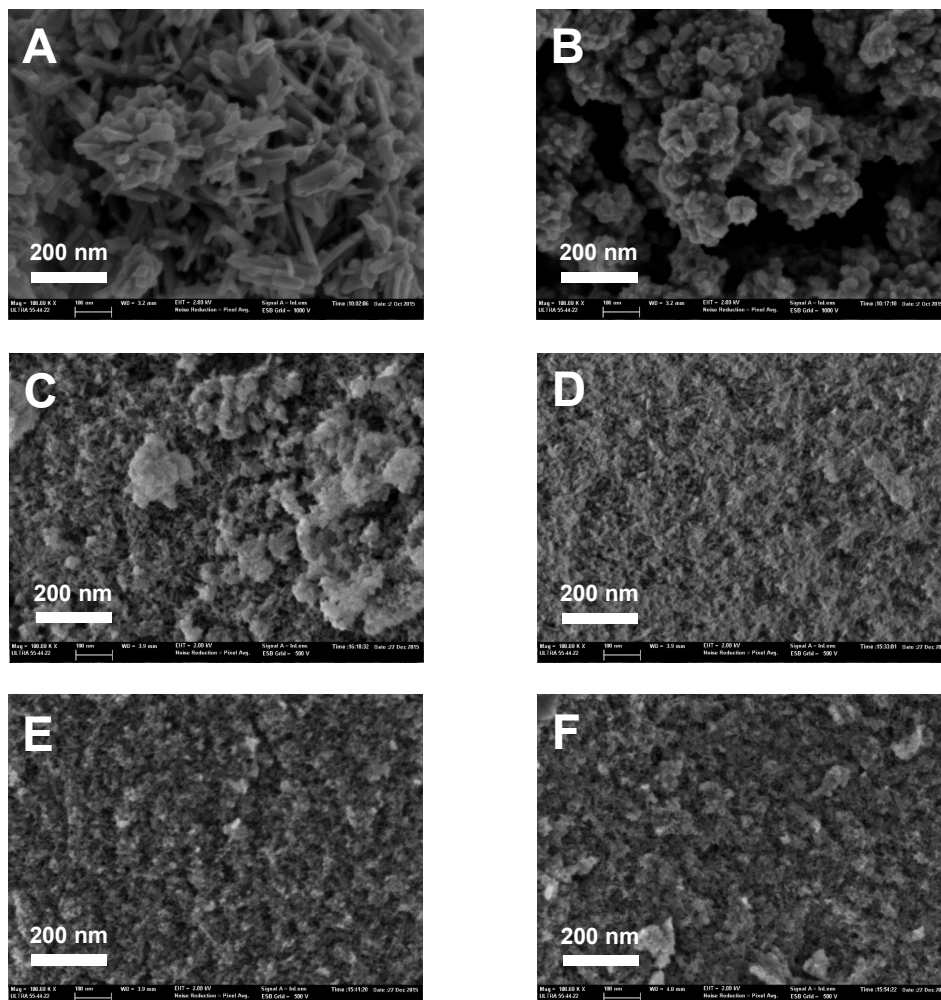

**Figure S2.** Scanning Electron Microscopy images of W-Nb-O oxides heat-treated at 550 °C in N<sub>2</sub> flow. A) WO<sub>x</sub>; B) WNb<sub>29</sub>; C) WNb<sub>62</sub>; D) WNb<sub>80</sub>; E) WNb<sub>95</sub>; F) Nb<sub>100</sub>.

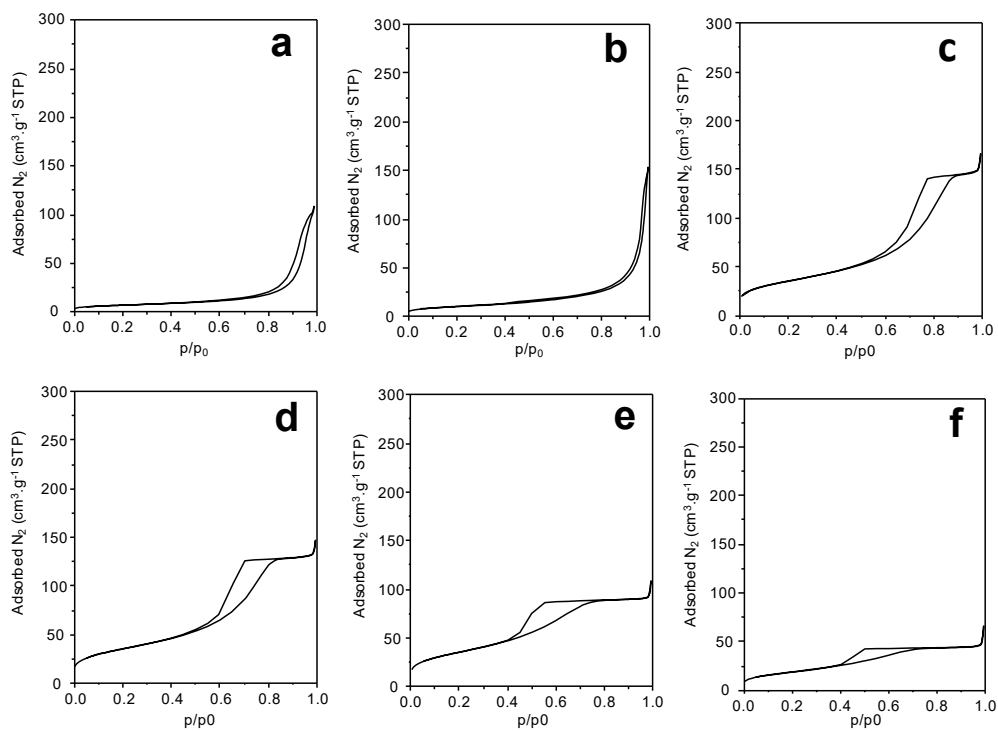

**Figure S3.** N<sub>2</sub>-adsorption-desorption isotherms of W-Nb-O oxide bronzes: a) WO<sub>x</sub>, b) WNb<sub>29</sub>, c) WNb<sub>62</sub>, d) WNb<sub>80</sub>, e) WNb<sub>95</sub>, f) WNb-1

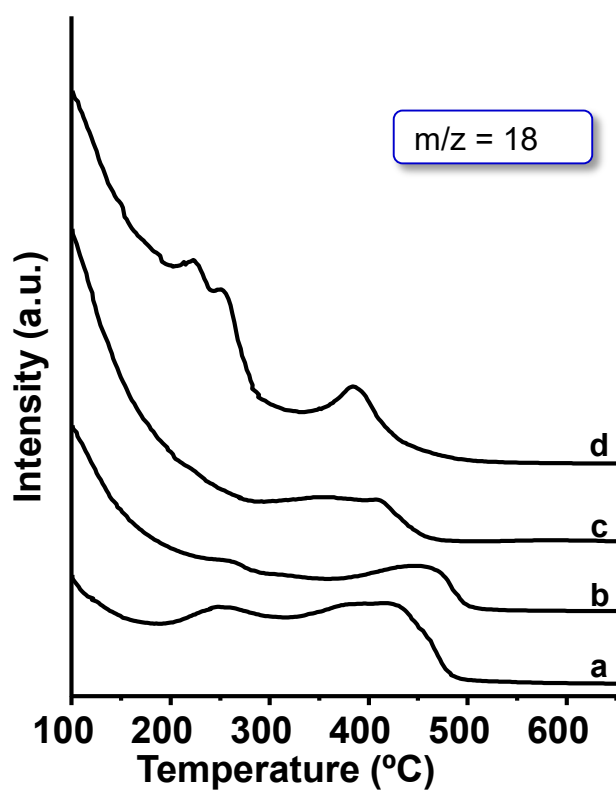

**Figure S4.** Temperature-programmed oxidation (TPO) profiles of selected as-prepared W-Nb-O samples, followed by mass spectrometry (characteristic mass of water,  $m/z=18$ ). Samples: a)  $\text{WO}_x$ ; b)  $\text{WNb}_{29}$ ; c)  $\text{WNb}_{62}$ ; d)  $\text{Nb}_{100}$ .

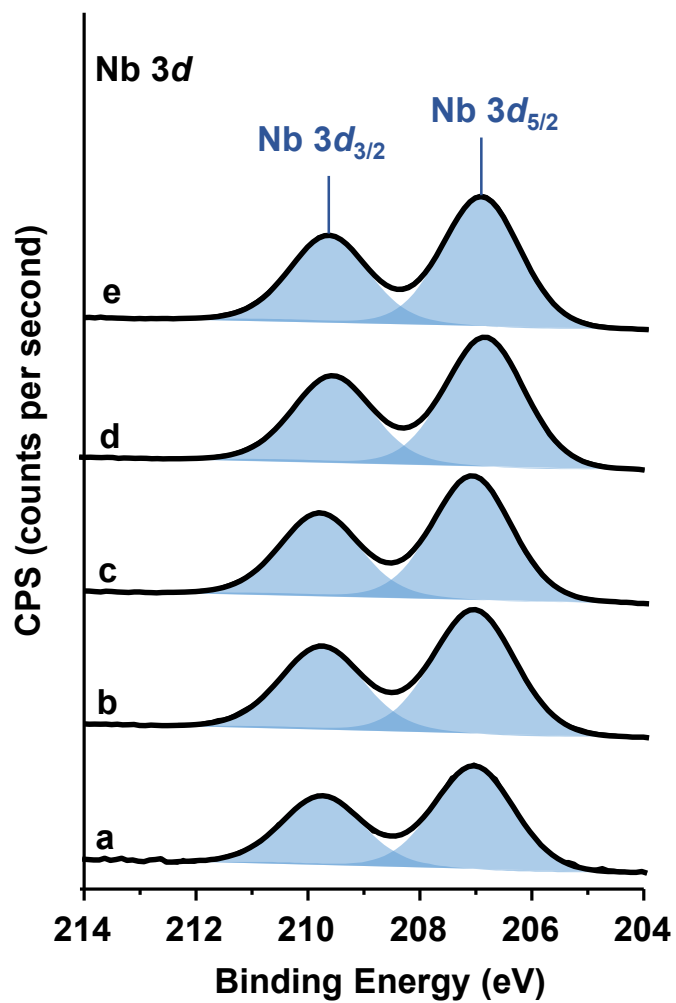

**Figure S5.** Nb 3d core-level XPS spectra of W-Nb-O oxides heat-treated at 550 °C in N<sub>2</sub> flow. Samples: a) WNb29; b) WNb62; c) WNb80; d) WNb95; e) Nb100.

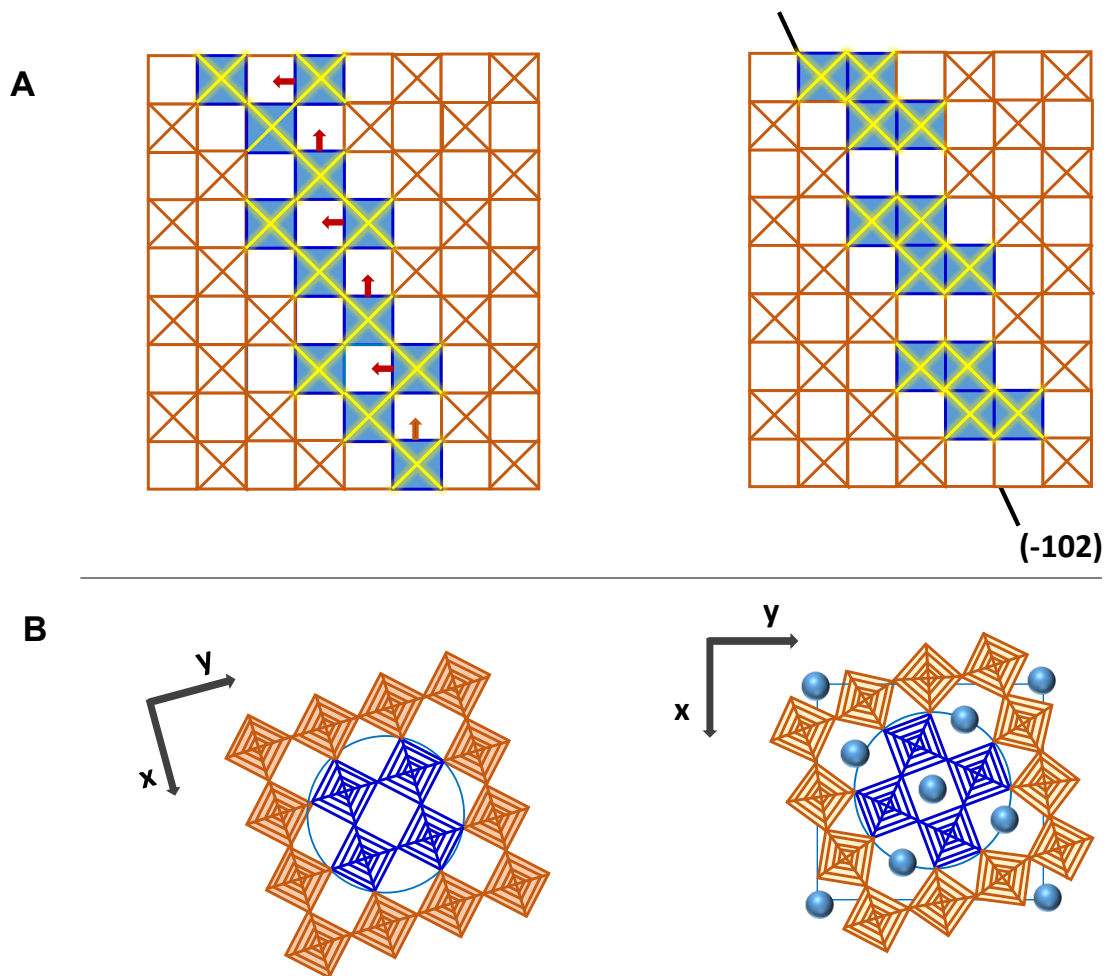

**Figure S6.** Schemes of the formation of the so-called Magneli phases (A) and tetragonal tungsten bronze (TTB) (B) from a  $\text{ReO}_3$ -type structure. Adapted from references [1] and [2].

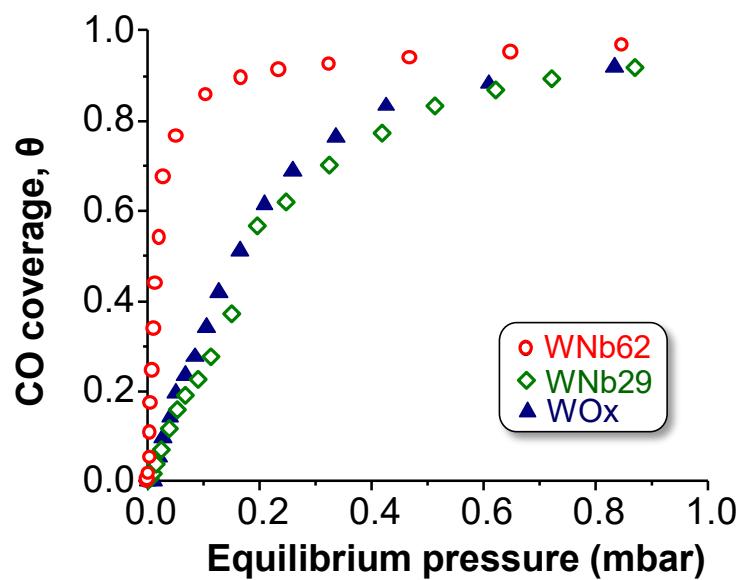

**Figure S7.** Variation of CO-coverage as a function of equilibrium pressure for selected W-Nb-O oxides, heat-treated at 550 °C.



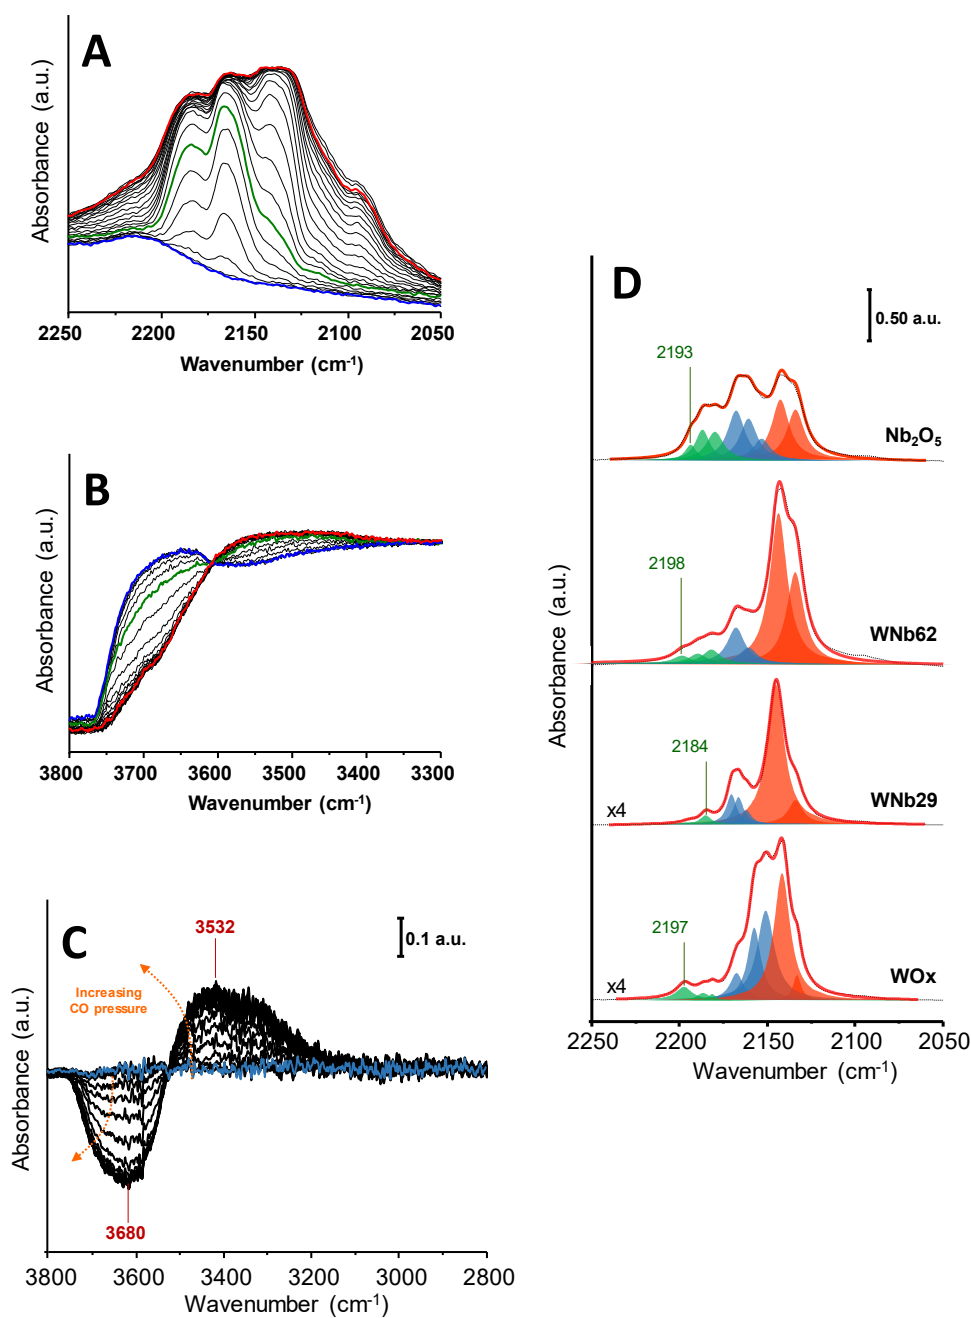

**Figure S8.** Low temperature (77K) FTIR spectra of adsorbed CO in the C-O (A) and O-H (B) stretching regions for hydrothermally synthesized Nb<sub>2</sub>O<sub>5</sub> heat-treated at 400 °C in N<sub>2</sub>. C) Background-subtracted FTIR spectra of adsorbed CO in the OH/NH stretching region for hydrothermally synthesized Nb<sub>2</sub>O<sub>5</sub> heat-treated at 400 °C in N<sub>2</sub>. D) CO-adsorption FTIR spectra (background-subtracted) and the corresponding deconvoluted spectra recorded at low temperature (77 K) at a CO-coverage of  $\theta=0.65$ .

**Table S1.** Textural properties of W-Nb-O oxide bronzes

| <b>Sample</b> | <b>S<sub>BET</sub><br/>(m<sup>2</sup> g<sup>-1</sup>)<sup>a</sup></b> | <b>Mesopore Volume<br/>(cm<sup>-3</sup> g<sup>-1</sup>)<sup>b</sup></b> |
|---------------|-----------------------------------------------------------------------|-------------------------------------------------------------------------|
| WOx           | 28                                                                    | 0.045                                                                   |
| WNb29         | 38                                                                    | 0.050                                                                   |
| WNb62         | 124                                                                   | 0.216                                                                   |
| WNb80         | 129                                                                   | 0.192                                                                   |
| WNb95         | 129                                                                   | 0.130                                                                   |
| Nb100         | 70                                                                    | 0.061                                                                   |

<sup>a</sup> Calculated from N<sub>2</sub> adsorption isotherms.

<sup>b</sup> Calculated by BJH method.

**Table S2.** Binding energies for main surface species in W-Nb-O oxides

| <b>Sample</b> | <b>C 1s<br/>(eV)</b> | <b>W 4f<sub>7/2</sub> (eV)<sup>a</sup></b> |                       | <b>Nb 3d<br/>(eV)<sup>a</sup></b> | <b>O 1s (lattice)<br/>(eV)<sup>a</sup></b> |
|---------------|----------------------|--------------------------------------------|-----------------------|-----------------------------------|--------------------------------------------|
|               |                      | <b>W<sup>6+</sup></b>                      | <b>W<sup>5+</sup></b> |                                   |                                            |
| WOx           | 285.7                | 35.4                                       | 34.6                  | ---                               | 530.1                                      |
| WNb29         | 287.2                | 35.7                                       | 34.1                  | 207.0                             | 530.1                                      |
| WNb62         | 286.4                | 35.7                                       | 34.7                  | 207.0                             | 530.2                                      |
| WNb80         | 286.4                | 35.7                                       | 34.7                  | 207.1                             | 530.2                                      |
| WNb95         | 286.3                | 35.4                                       | 34.4                  | 206.8                             | 529.9                                      |
| Nb100         | 286.3                | ---                                        | ---                   | 206.9                             | 529.9                                      |

a. Corrected to C1s= 284.5 eV

## References:

- [1] C. N. R. Rao, J. Gopalakrishnan, *New directions in Solid State Chemistry*, Second Edition, Cambridge University Press, 1997, pp. 258. [2] L. A. Bursill, B. G. Hyde, *Nature Physical Science* 240 (1972) 122-124
